# Supplementary material for: Mutagenesis and Resistance Development of Bacteria Challenged by Silver Nanoparticles
Source: PubMed Central journal article supplement (PMC9578424; doi:10.1128/aac.00628-22), 2022-09-12
Supplement: aac.00628-22-s0001.pdf [file aac.00628-22-s0001.pdf]

## 1 **Supplementary Methods**

2

### 3 **Ka/Ks calibration**

4 Ka/Ks, the ratio of the nonsynonymous substitution rate to the synonymous rate, estimates the  
5 selective strength conferred on a gene. However, in our experimental evolution experiments  
6 (control or 60 µg/ml AgNPs treatment), many genes had 0 synonymous mutation hits, i.e. the  
7 denominator Ks being 0. We thus calibrated the ratio by modeling the synonymous base  
8 substitutions in each gene of either the control or the treatment, by taking mutation rates from  
9 MA transferred on plain LB into account and assuming that synonymous sites are neutral. Thus,  
10 the expected number of synonymous substitutions is modelled by:

$$11 \quad \tau(d) = \sum_1^n Nm \mu d$$

12 Where  $n$  is the number of transfers,  $N$  is the number of cell divisions per transfer,  $m$  is the  
13 number of parallel lines in either group,  $\mu$  is the mutation rate at four-fold degenerate sites of  
14 MA without AgNPs treatment,  $d$  is the number of synonymous sites in the gene.

15 We evaluated the goodness of fit with the observed synonymous substitutions in each gene  
16 of each group, using a regular linear model:  $y = \alpha + \beta x$ , where  $x$  is the number of four-fold  
17 degenerate sites in the gene,  $y$  is the observed number of synonymous substitutions. Based on  
18 regressions of the observed data, we set the limits of  $\alpha$  ( $-3, 3$ ) and  $\beta$  ( $-0.01, 0.01$ ) and then  
19 performed 1000 random bootstrappings of their combinations (fig. S3B, Supplementary  
20 Material), and compared the expected Ks based on the top ten best-fit  $\alpha$  and  $\beta$  combinations  
21 with our Ks estimates ( $\sum_1^n Nm \mu$ ), using the least-squares method. We also used another simple  
22 method to check modelled Ks, assuming  $Ks = \frac{Ms}{Ns} \approx \frac{Ms+1}{Ns}$ , where the  $Ms$  is synonymous  
23 substitutions and  $Ns$  is synonymous sites and the result is similar to the above. Our Ks in the  
24 final Ka/Ks calculation for each gene was based on the modeling.

25

26 **Supplementary Figures**

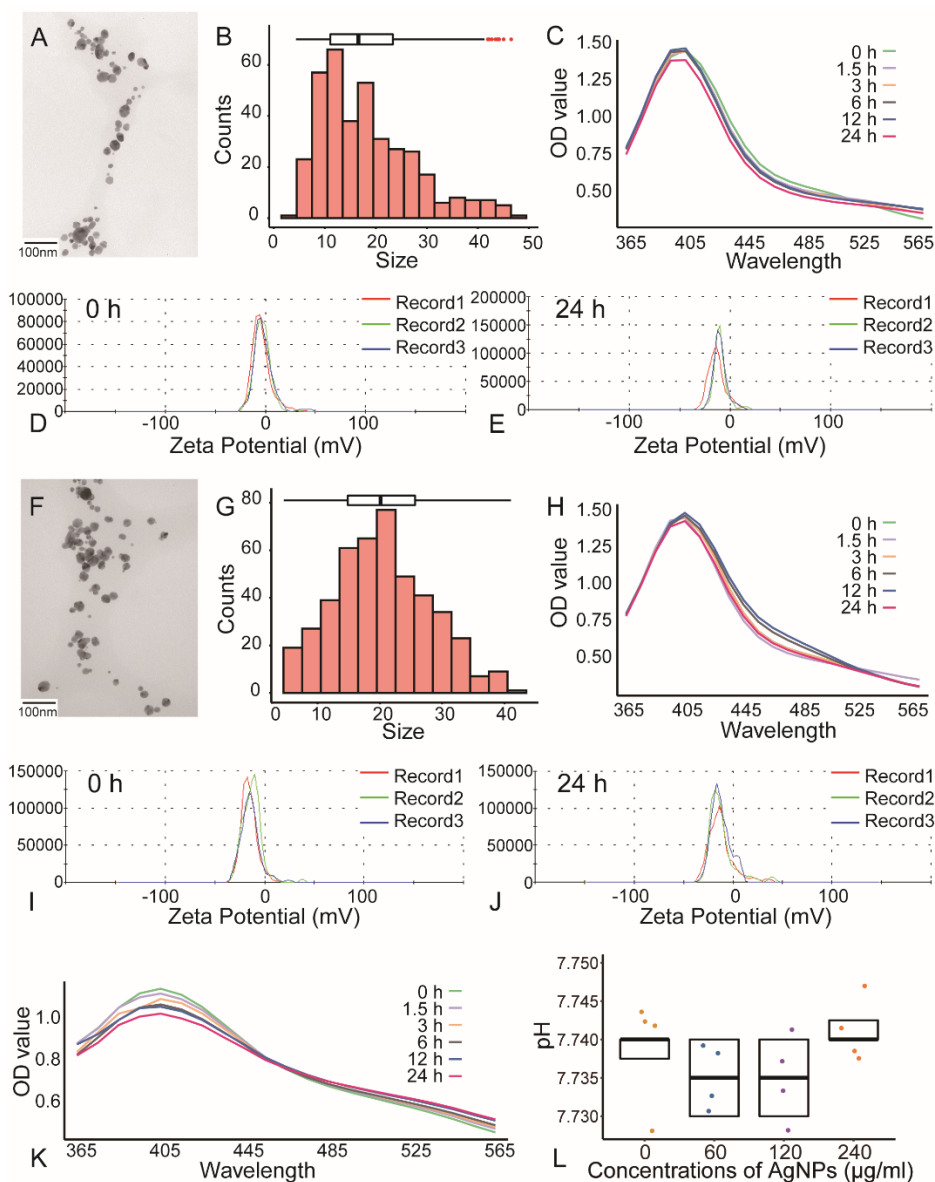

27

28 **Fig. S1. The physical characteristics of AgNPs at 25 °C (A-E, L), 60 °C (F-J; water-bathed**  
 29 **for 10 minutes, mimicking the process of adding AgNPs to 60 °C hot agar when making**  
 30 **LB plates with AgNPs) and in LB broth (K). (A) The TEM of AgNPs. (B) The size**  
 31 **distribution of AgNPs, based on 373 AgNPs. The boxplot shows the median size ~18.21 nm**  
 32 **(SD = 9.28). (C) The absorbance of UV-spectrum measured by UV-vis at 0h, 1.5h, 3h, 6h, 12h,**  
 33 **24h. (D, E) The zeta potential of AgNPs at 0h and 24h respectively and the mean zeta potential**  
 34 **is -15.27 mV (SD = 0.19) and -13.70 mV (SD = 0.50). (F) AgNPs under TEM. (G) Size**  
 35 **distribution of AgNPs with the median of 20.46 nm (SD = 7.62; 452 AgNPs were measured).**  
 36 **(H) UV-spectrum in distilled water within 24h. (I) The zeta potential of AgNPs (-14.97 mV,**  
 37 **SD = 0.66) at 0h and (J) the zeta potential (-13.36 mV, SD = 0.26) at 24 h at 60 °C. (K) UV**  
 38 **absorbance time-series of AgNPs in LB broth. (L) pH of LB plates with different concentrations**  
 39 **of AgNPs (0, 60, 120, 240 µg/ml).**

40

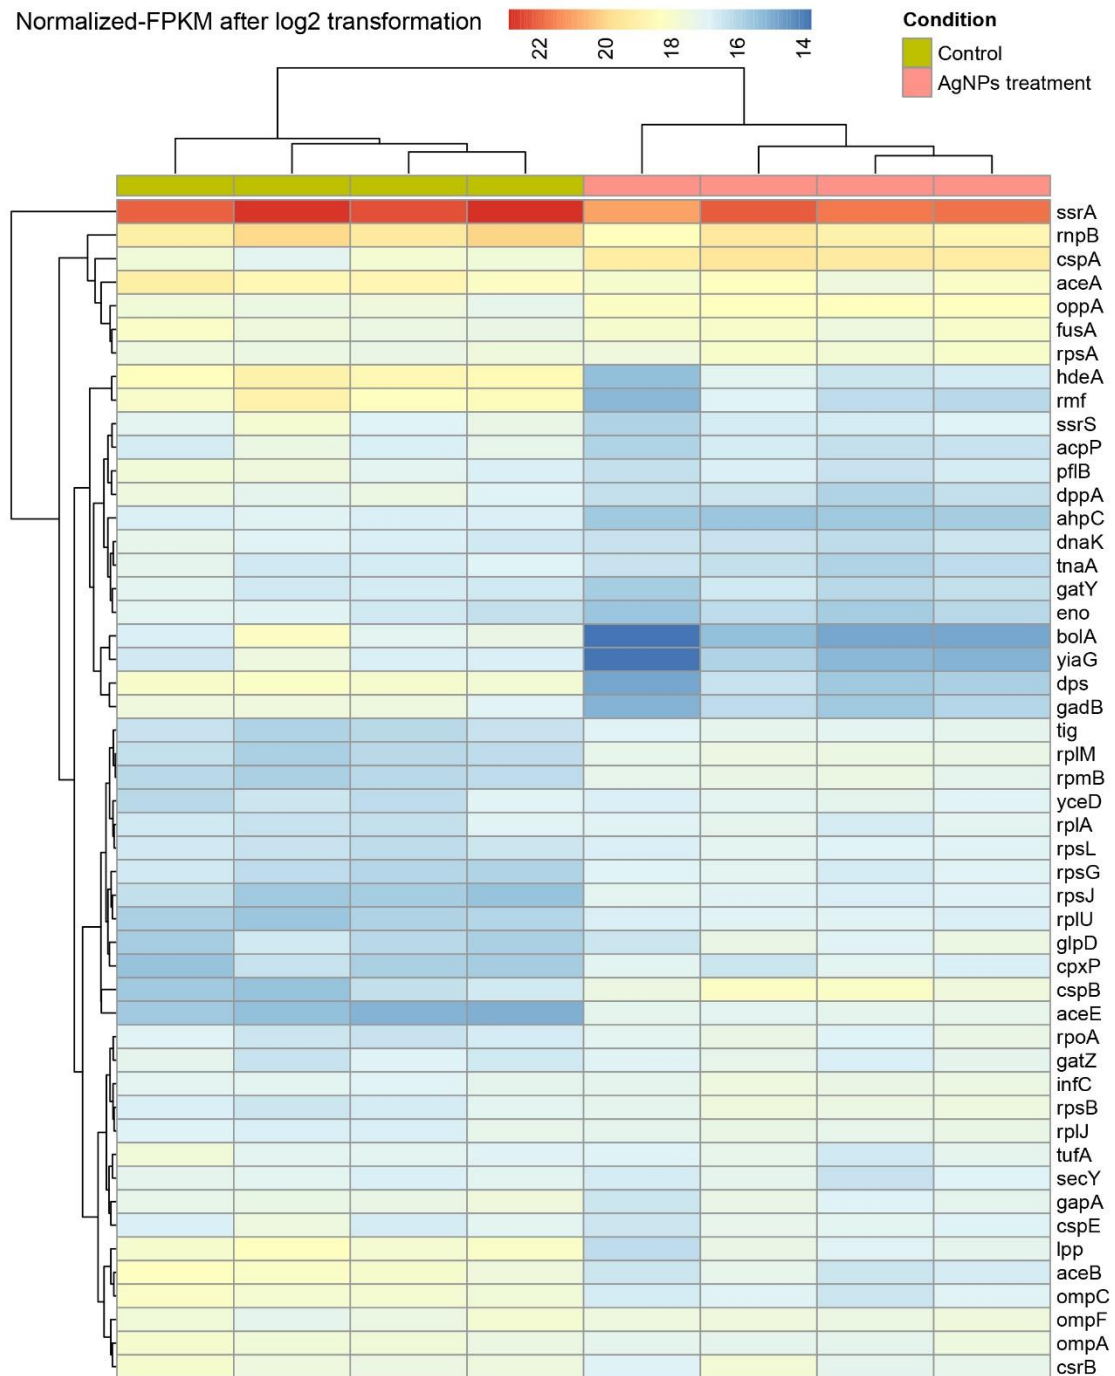

41

42 **Fig. S2. The heat map of top 50 differentially-expressed genes in the control and the**  
 43 **AgNPs-treatment after log2 transformation.**

44

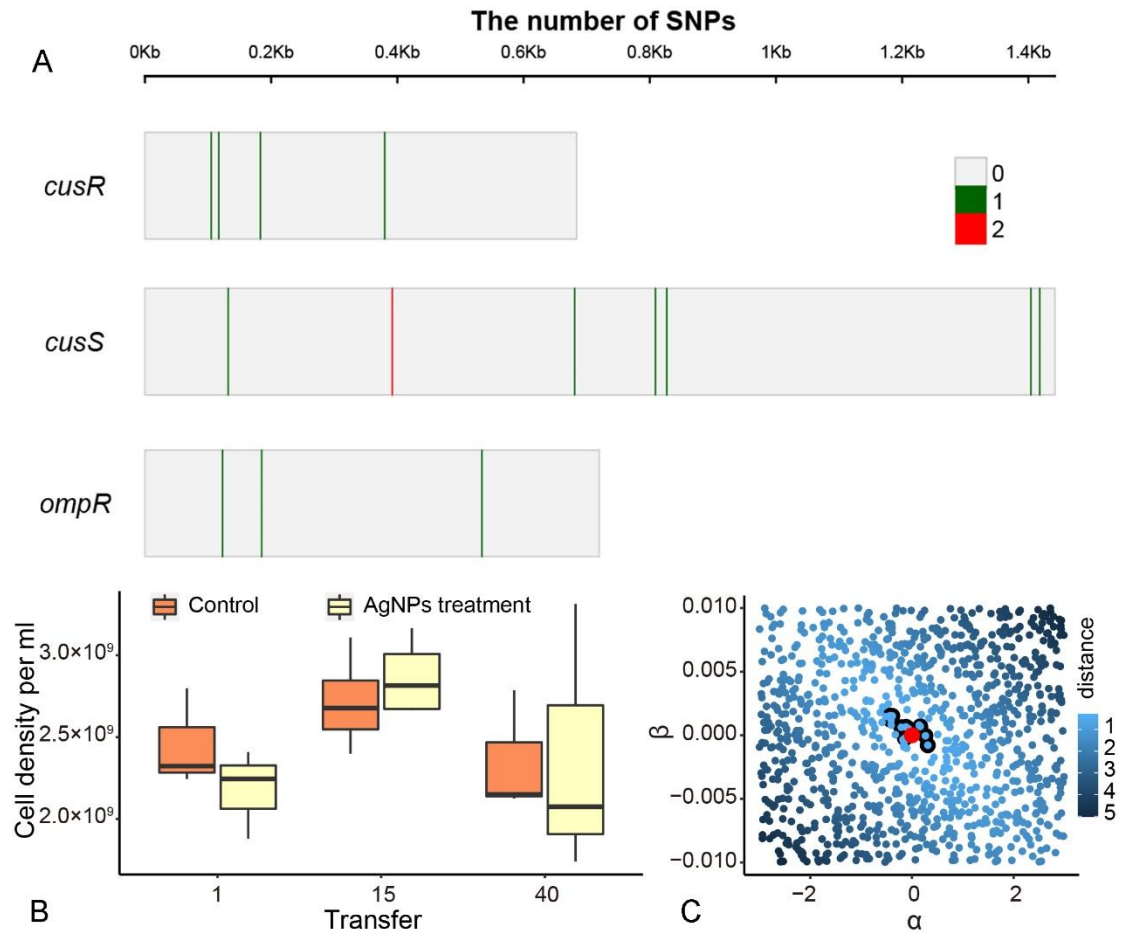

45

46 **Fig. S3. (A)** The SNP density of resistance genes—*cusR*, *cusS* and *ompR*. **(B)** The CFU of the  
 47 control and AgNPs-treatment in the 1<sup>st</sup>, 15<sup>th</sup> and 40<sup>th</sup> transfer respectively. **(C)** The expected  
 48 vs. the mean Ks. Blue dots represent the expected Ks from linear regression model, and dots  
 49 in black are the top ten best fits. The red dot represents the mean Ks from MA.

50

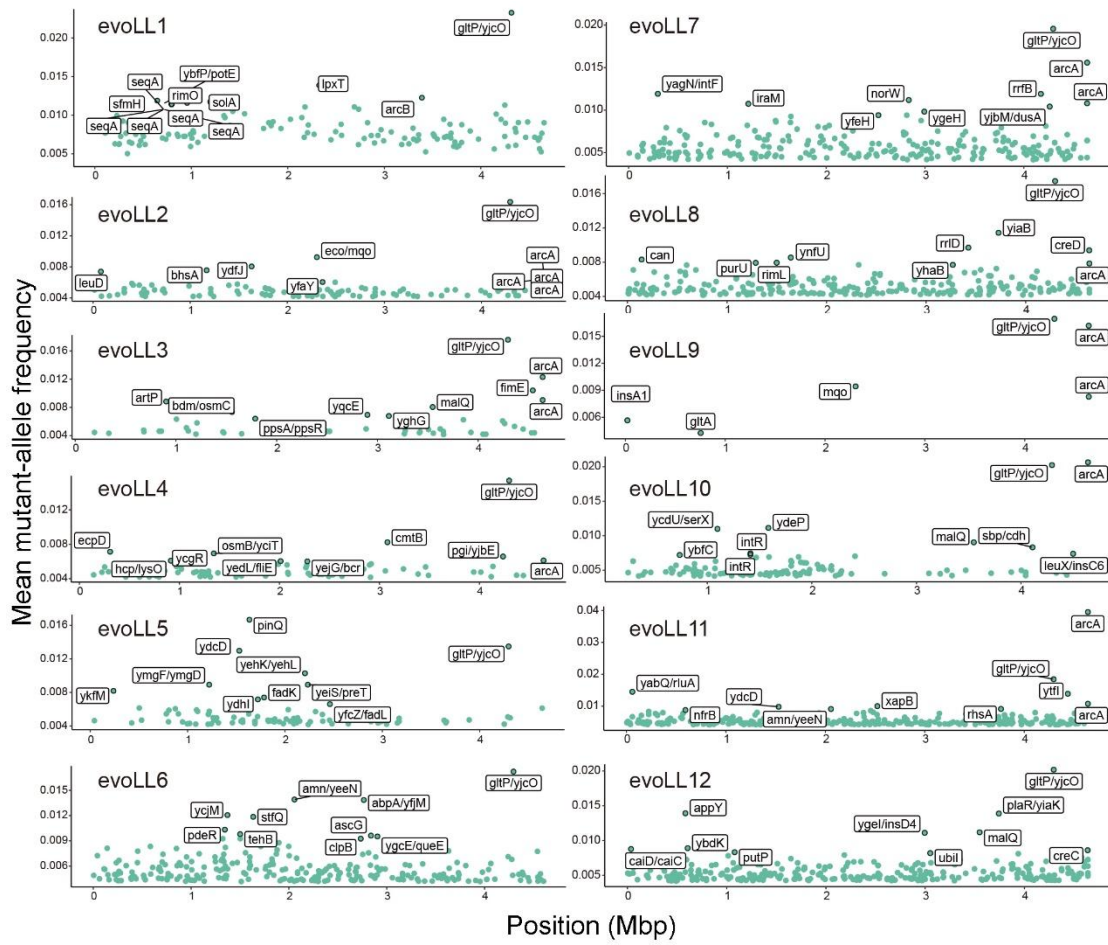

51

52 **Fig. S4. The mean mutant-allele frequencies of genomic sites in the control lines.**

53

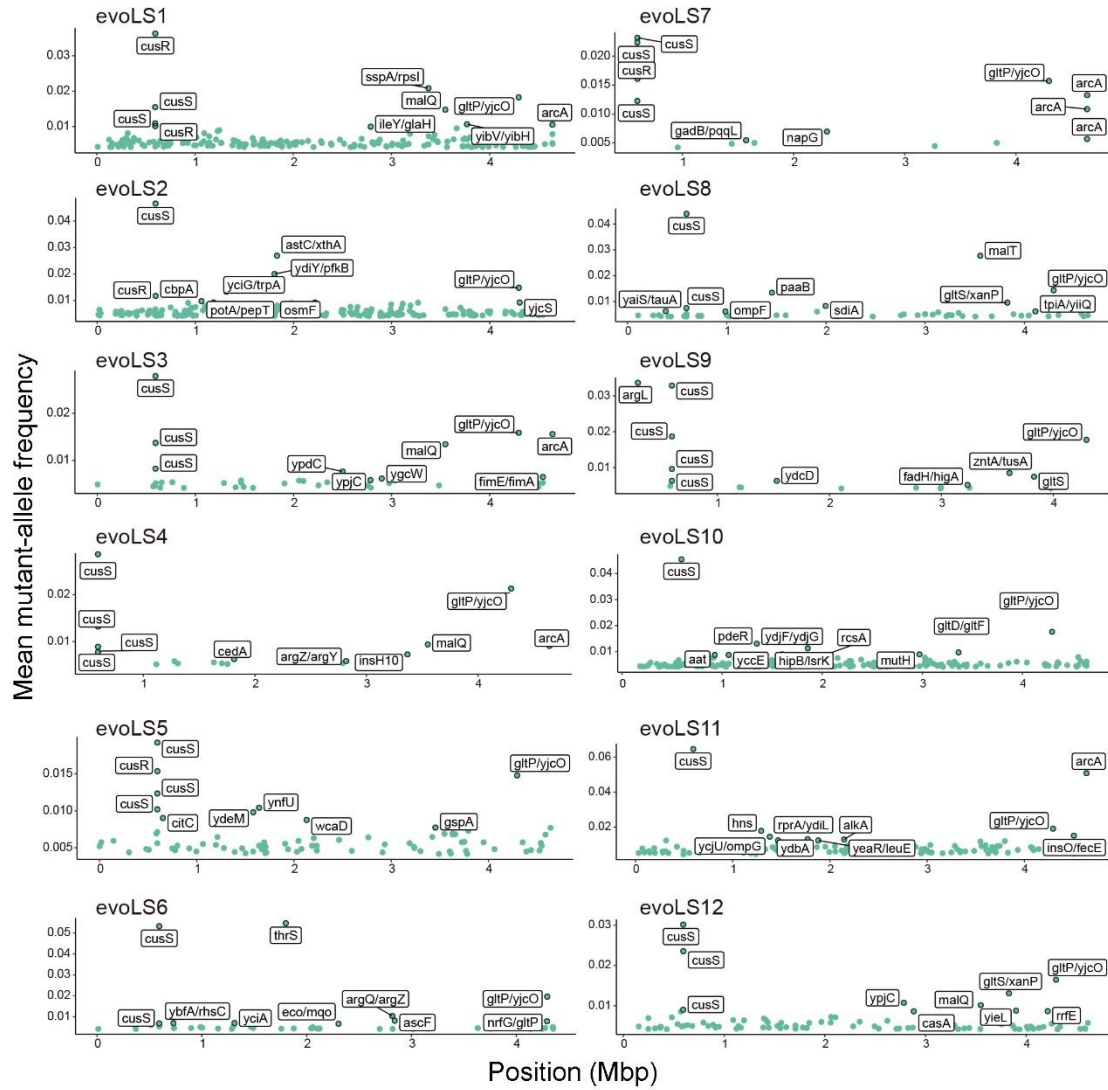

54

55 **Fig. S5. The mean mutant-allele frequencies of genomic sites in the AgNPs-treated lines.**

56

57

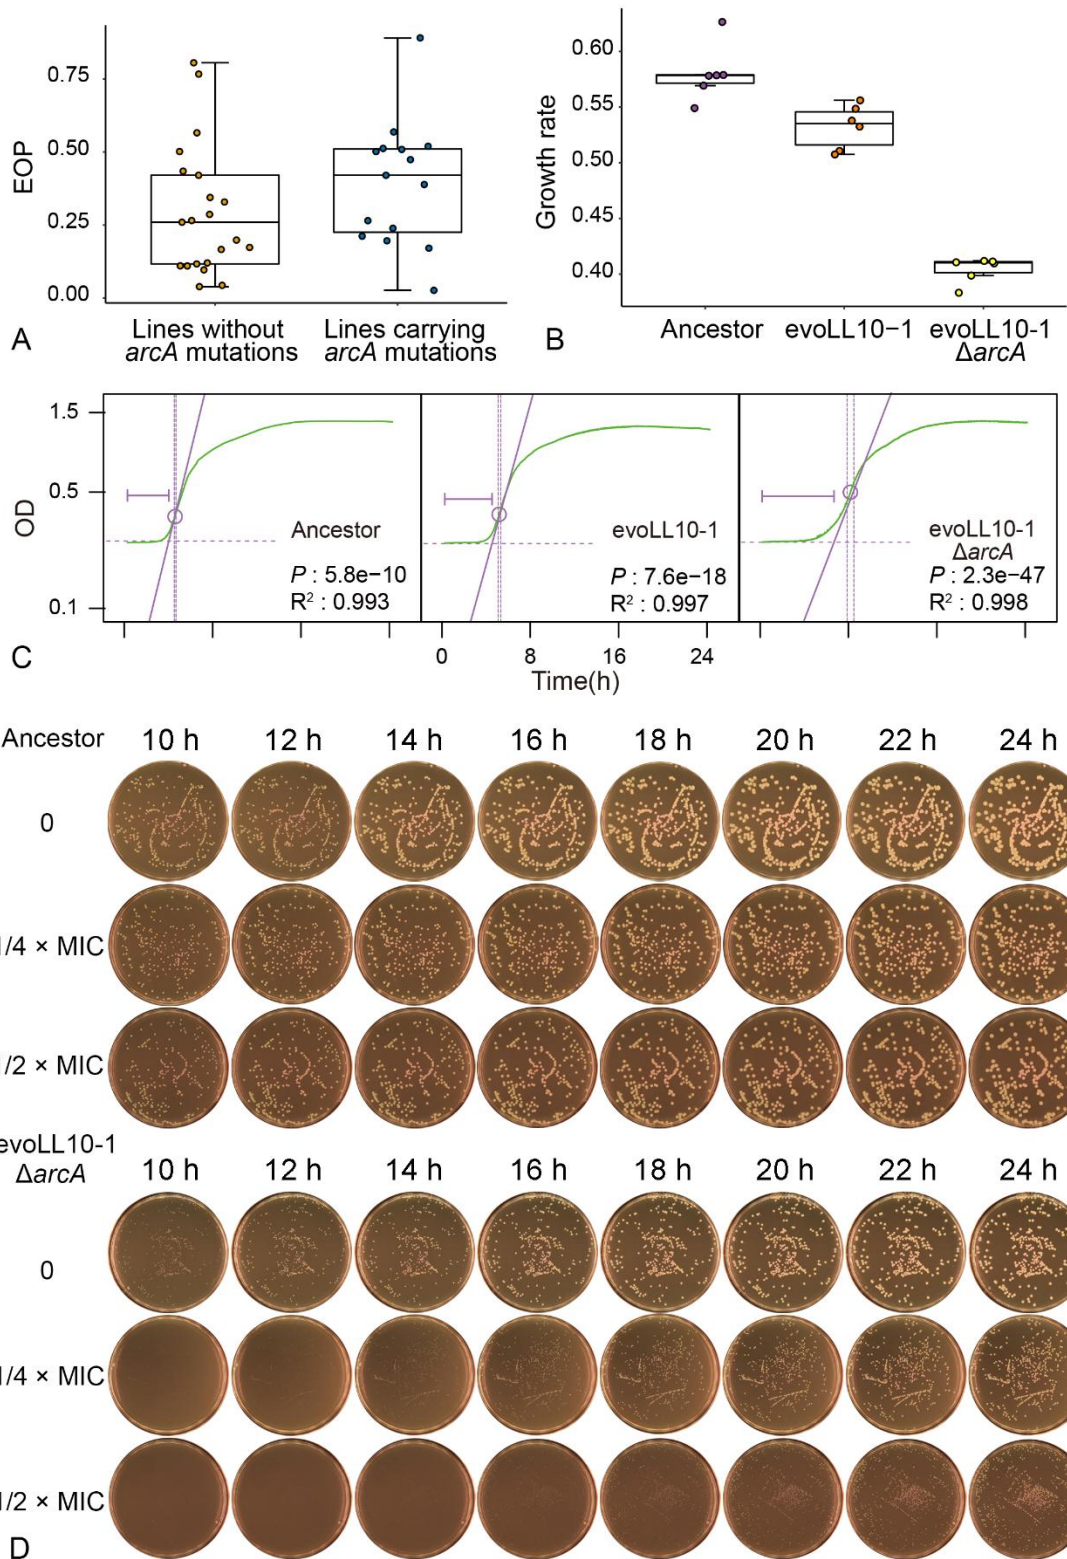

58  
 59 **Fig. S6. The EOP (A) and growth rates (B-D) of the control experimental evolution lines.**  
 60 (A) The lines were from single colonies of the control experimental evolution lines; the EOP  
 61 of these lines with and without *arcA* mutations at  $2\times$  ancestral MIC. (B) The growth rates of  
 62 ancestor, evoLL10-1 and evoLL10-1  $\Delta arcA$  in LB broth without AgNPs. (C) From left to right  
 63 is the bacterial growth curve of the ancestor, evoLL10-1 and evoLL10-1  $\Delta arcA$ . Horizontal  
 64 light purple line segments represent duration of the lag phase. The purple circles mark the time points

65 of the maximum growth rates during exponential phase. **(D)** Colony sizes of the ancestor and  
66 evoLL10-1 *ΔarcA* from 10 to 24 hours, treated with 0, 1/4× or 1/2× MIC of AgNPs. Note  
67 colonies are tiny on the evoLL10-1 *ΔarcA* AgNPs-treated plates.
